# Supplementary material for: The SAFEST review: a mixed methods systematic review of shock-absorbing flooring for fall-related injury prevention
Source: PubMed Central journal article supplement (PMC8739972; doi:10.1186/s12877-021-02670-4), 2022-01-06
Supplement: 12877_2021_2670_MOESM1_ESM.pdf [file 12877_2021_2670_MOESM1_ESM.pdf]

## Additional file 1: Search strategy of Medline

- 1 MH "Wounds and Injuries+
- 2 MH "Accidental Falls/PC"
- 3 MH "Hip Fractures+/PC"
- 4 Fall#
- 5 Faller#
- 6 S1 OR S2 OR S3 OR S4 OR S5
- 7 MH "Aged+"
- 8 MH "Middle Aged"
- 9 Older
- 10 Senior#
- 11 elderly
- 12 S7 OR S8 OR S9 OR S10 OR S11
- 13 S6 AND S12
- 14 MH "Residential Facilities+"
- 15 MH "Long-Term Care"
- 16 MH "Institutionalization"
- 17 MH "Hospitalization"
- 18 MH "Subacute Care"
- 19 MH "Hospitals+"
- 20 MH "Hospital Units"
- 21 MH "Rehabilitation Centers"
- 22 MH "Inpatients"
- 23 MH "Geriatric Assessment"
- 24 ("long stay" or "long term" or "acute" or "sub-acute" or "subacute" or "residential" or "hospital")  
N3 (care or ward# or hospital)
- 25 (rehabilitation or geriatric) N1 (ward# or hospital# or unit# or department#)
- 26 Hostel# or nursing home#
- 27 inpatient
- 28 resident#
- 29 institution#

- 30 S14 OR S15 OR S16 OR S17 OR S18 OR S19 OR S20 OR S21 OR S22 OR S23 OR S24 OR S25 OR S26 OR S27 OR S28 OR S29
- 31 S13 and S30
- 32 floor\* NOT (pelvic floor OR sinus OR mouth)
- 33 carpet\*
- 34 ground surface#
- 35 smartcell\*
- 36 tarkett
- 37 softile
- 38 sorbashock
- 39 forbo
- 40 kradal
- 41 noraplan
- 42 MH "Floors and Floorcoverings"
- 43 S32 OR S33 OR S34 OR S35 OR S36 OR S37 OR S38 OR S39 OR S40 OR S41 OR S42
- 44 S31 AND S43
- 45 MH "Animals+"
- 46 MH "Humans"
- 47 S45 NOT S46
- 48 S44 NOT S47
- 49 S44 NOT S47

Limiters - Date of Publication: 2016-05-01-
